# Supplementary material for: How can China's circular economy be improved in consequence of industrial agglomeration choosing? Analysis from the perspective of factor augmenting technologies
Source: Research Square preprint supplement (doi:10.21203/rs.3.rs-7781258/v1), 2025-11-17
Supplement: Supplementary file 1 [file 4949a6d851ba7f7b959331ea.docx]

**Appendix**

Table T1. IV estimate results of *Aal*

| Panel A: IV estimates of specialization agglomeration on factor misallocation | | | | |
| --- | --- | --- | --- | --- |
|  | First stage |  | Second stage |  |
|  | *Aal* | *Lmi* | *Emi* | *Cmi* |
| *Spe* | 0.136*** | -0.617** | -0.108*** | -0.047** |
|  | (0.010) | (0.273) | (0.021) | (0.019) |
| F | 184.99 |  |  |  |
| KPLM |  | 510.35*** | 457.39*** | 457.39*** |
| Controls | Y | Y | Y | Y |
| City fixed effect | Y | Y | Y | Y |
| Industry fixed effect | Y | Y | Y | Y |
| Year fixed effect | Y | Y | Y | Y |
| R2 | 0.071 | 0.144 | 0.072 | 0.239 |
| N | 49531 | 49531 | 49531 | 49531 |
| Panel B: IV estimates of diversification agglomeration on factor misallocation | | | | |
|  | First stage |  | Second stage |  |
|  | *Aal* | *Lmi* | *Emi* | *Cmi* |
| *Div* | 0.222*** | -0.377 | -0.927* | -0.528 |
|  | (0.033) | (0.281) | (0.495) | (0.401) |
| F | 44.02 |  |  |  |
| KPLM |  | 190.93*** | 45.59*** | 45.43*** |
| Controls | Y | Y | Y | Y |
| City fixed effect | Y | Y | Y | Y |
| Industry fixed effect | Y | Y | Y | Y |
| Year fixed effect | Y | Y | Y | Y |
| R2 | 0.166 | 0.131 | 0.051 | 0.237 |
| N | 49531 | 49531 | 49531 | 49531 |
| Panel C: IV estimates of related diversification agglomeration on factor misallocation | | | | |
|  | First stage |  | Second stage |  |
|  | *Aal* | *Lmi* | *Emi* | *Cmi* |
| *Rel* | 0.506*** | -0.686 | -0.601*** | -0.354 |
|  | (0.011) | (0.912) | (0.028) | (0.434) |
| F | 2044.52 |  |  |  |
| KPLM |  | 361.96*** | 1736.84*** | 113.06*** |
| Controls | Y | Y | Y | Y |
| City fixed effect | Y | Y | Y | Y |
| Industry fixed effect | Y | Y | Y | Y |
| Year fixed effect | Y | Y | Y | Y |
| R2 | 0.138 | 0.132 | 0.157 | 0.194 |
| N | 49531 | 49531 | 49531 | 49531 |
| Panel D: IV estimates of unrelated diversification agglomeration on factor misallocation | | | | |
|  | First stage |  | Second stage |  |
|  | *Aal* | *Lmi* | *Emi* | *Cmi* |
| *Unr* | 0.199*** | 1.117** | 0.784*** | 0.612*** |
|  | (0.017) | (0.547) | (0.223) | (0.233) |
| F | 131.33 |  |  |  |
| KPLM |  | 133.16*** | 15.66*** | 14.78*** |
| Controls | Y | Y | Y | Y |
| City fixed effect | Y | Y | Y | Y |
| Industry fixed effect | Y | Y | Y | Y |
| Year fixed effect | Y | Y | Y | Y |
| R2 | 0.132 | 0.131 | 0.108 | 0.393 |
| N | 49531 | 49531 | 49531 | 49531 |

Table T2. IV estimate results of *Lar*

| Panel A: IV estimates of specialization agglomeration on factor misallocation | | | | |
| --- | --- | --- | --- | --- |
|  | First stage |  | Second stage |  |
|  | *Lar* | *Lmi* | *Emi* | *Cmi* |
| *Spe* | 0.591*** | -1.821* | -0.163*** | -0.605** |
|  | (0.006) | (1.003) | (0.051) | (0.239) |
| F | 193.05 |  |  |  |
| KPLM |  | 110.76*** | 110.76*** | 81.50*** |
| Controls | Y | Y | Y | Y |
| City fixed effect | Y | Y | Y | Y |
| Industry fixed effect | Y | Y | Y | Y |
| Year fixed effect | Y | Y | Y | Y |
| R2 | 0.152 | 0.043 | 0.095 | 0.039 |
| N | 49531 | 49531 | 49531 | 49531 |
| Panel B: IV estimates of diversification agglomeration on factor misallocation | | | | |
|  | First stage |  | Second stage |  |
|  | *Lar* | *Lmi* | *Emi* | *Cmi* |
| *Div* | 0.546*** | -0.709 | -0.825* | -0.499 |
|  | (0.014) | (0.722) | (0.455) | (0.477) |
| F | 1549.52 |  |  |  |
| KPLM |  | 1624.55*** | 1596.96*** | 940.13*** |
| Controls | Y | Y | Y | Y |
| City fixed effect | Y | Y | Y | Y |
| Industry fixed effect | Y | Y | Y | Y |
| Year fixed effect | Y | Y | Y | Y |
| R2 | 0.306 | 0.350 | 0.055 | 0.323 |
| N | 49531 | 49531 | 49531 | 49531 |
| Panel C: IV estimates of related diversification agglomeration on factor misallocation | | | | |
|  | First stage |  | Second stage |  |
|  | *Lar* | *Lmi* | *Emi* | *Cmi* |
| *Rel* | 0.710*** | -0.848 | -0.938*** | -0.741 |
|  | (0.014) | (1.031) | (0.082) | (9.040) |
| F | 2698.34 |  |  |  |
| KPLM |  | 1943.11*** | 1666.96*** | 1520.49*** |
| Controls | Y | Y | Y | Y |
| City fixed effect | Y | Y | Y | Y |
| Industry fixed effect | Y | Y | Y | Y |
| Year fixed effect | Y | Y | Y | Y |
| R2 | 0.108 | 0.356 | 0.030 | 0.341 |
| N | 49531 | 49531 | 49531 | 49531 |
| Panel D: IV estimates of unrelated diversification agglomeration on factor misallocation | | | | |
|  | First stage |  | Second stage |  |
|  | *Lar* | *Lmi* | *Emi* | *Cmi* |
| *Unr* | -0.219*** | 1.070** | 1.113*** | 1.071* |
|  | (0.038) | (0.519) | (0.221) | (0.623) |
| F | 32.65 |  |  |  |
| KPLM |  | 48.03*** | 32.72*** | 32.96*** |
| Controls | Y | Y | Y | Y |
| City fixed effect | Y | Y | Y | Y |
| Industry fixed effect | Y | Y | Y | Y |
| Year fixed effect | Y | Y | Y | Y |
| R2 | 0.158 | 0.125 | 0.181 | 0.044 |
| N | 49531 | 49531 | 49531 | 49531 |

Table T3. IV estimate results of *Trl*

| Panel A: IV estimates of specialization agglomeration on factor misallocation | | | | |
| --- | --- | --- | --- | --- |
|  | First stage |  | Second stage |  |
|  | *Trl* | *Lmi* | *Emi* | *Cmi* |
| *Spe* | 0.055*** | -1.193** | -1.127* | -1.026** |
|  | (0.006) | (0.585) | (0.670) | (0.403) |
| F | 73.00 |  |  |  |
| KPLM |  | 81.76*** | 1117.73*** | 549.43*** |
| Controls | Y | Y | Y | Y |
| City fixed effect | Y | Y | Y | Y |
| Industry fixed effect | Y | Y | Y | Y |
| Year fixed effect | Y | Y | Y | Y |
| R2 | 0.223 | 0.021 | 0.030 | 0.059 |
| N | 49531 | 49531 | 49531 | 49531 |
| Panel B: IV estimates of diversification agglomeration on factor misallocation | | | | |
|  | First stage |  | Second stage |  |
|  | *Trl* | *Lmi* | *Emi* | *Cmi* |
| *Div* | 0.051*** | -0.944 | -0.511* | -0.127 |
|  | (0.001) | (0.927) | (0.280) | (0.288) |
| F | 2892.84 |  |  |  |
| KPLM |  | 2555*** | 2535.31*** | 1578.23*** |
| Controls | Y | Y | Y | Y |
| City fixed effect | Y | Y | Y | Y |
| Industry fixed effect | Y | Y | Y | Y |
| Year fixed effect | Y | Y | Y | Y |
| R2 | 0.478 | 0.350 | 0.053 | 0.323 |
| N | 49531 | 49531 | 49531 | 49531 |
| Panel C: IV estimates of related diversification agglomeration on factor misallocation | | | | |
|  | First stage |  | Second stage |  |
|  | *Trl* | *Lmi* | *Emi* | *Cmi* |
| *Rel* | 0.065*** | -0.613 | -1.503*** | -0.937 |
|  | (0.001) | (0.545) | (0.120) | (1.337) |
| F | 6067.74 |  |  |  |
| KPLM |  | 3683.70*** | 3558.29*** | 4416.39*** |
| Controls | Y | Y | Y | Y |
| City fixed effect | Y | Y | Y | Y |
| Industry fixed effect | Y | Y | Y | Y |
| Year fixed effect | Y | Y | Y | Y |
| R2 | 0.158 | 0.356 | 0.026 | 0.261 |
| N | 49531 | 49531 | 49531 | 49531 |
| Panel D: IV estimates of unrelated diversification agglomeration on factor misallocation | | | | |
|  | First stage |  | Second stage |  |
|  | *Trl* | *Lmi* | *Emi* | *Cmi* |
| *Unr* | -0.055*** | 0.350** | 0.687*** | 0.778*** |
|  | (0.002) | (0.144) | (0.088) | (0.246) |
| F | 1164.62 |  |  |  |
| KPLM |  | 784.53*** | 100.28*** | 100.27*** |
| Controls | Y | Y | Y | Y |
| City fixed effect | Y | Y | Y | Y |
| Industry fixed effect | Y | Y | Y | Y |
| Year fixed effect | Y | Y | Y | Y |
| R2 | 0.149 | 0.112 | 0.094 | 0.012 |
| N | 49531 | 49531 | 49531 | 49531 |

Table T4. IV estimate results of *Rde*

| Panel A: IV estimates of specialization agglomeration on factor misallocation | | | | |
| --- | --- | --- | --- | --- |
|  | First stage |  | Second stage |  |
|  | *Rde* | *Lmi* | *Emi* | *Cmi* |
| *Spe* | 0.559*** | -1.151* | -1.326* | -1.045*** |
|  | (0.077) | (0.683) | (0.715) | (0.363) |
| F | 52.26 |  |  |  |
| KPLM |  | 464.17*** | 1093.55*** | 1029.17*** |
| Controls | Y | Y | Y | Y |
| City fixed effect | Y | Y | Y | Y |
| Industry fixed effect | Y | Y | Y | Y |
| Year fixed effect | Y | Y | Y | Y |
| R2 | 0.246 | 0.018 | 0.030 | 0.070 |
| N | 49531 | 49531 | 49531 | 49531 |
| Panel B: IV estimates of diversification agglomeration on factor misallocation | | | | |
|  | First stage |  | Second stage |  |
|  | *Rde* | *Lmi* | *Emi* | *Cmi* |
| *Div* | 0.513*** | -1.252 | -1.225* | -1.037 |
|  | (0.013) | (7.783) | (0.707) | (0.944) |
| F | 1583.67 |  |  |  |
| KPLM |  | 2690.14*** | 1802.68*** | 1319.58*** |
| Controls | Y | Y | Y | Y |
| City fixed effect | Y | Y | Y | Y |
| Industry fixed effect | Y | Y | Y | Y |
| Year fixed effect | Y | Y | Y | Y |
| R2 | 0.293 | 0.058 | 0.030 | 0.323 |
| N | 49531 | 49531 | 49531 | 49531 |
| Panel C: IV estimates of related diversification agglomeration on factor misallocation | | | | |
|  | First stage |  | Second stage |  |
|  | *Rde* | *Lmi* | *Emi* | *Cmi* |
| *Rel* | 0.653*** | -1.027 | -1.831*** | -1.084 |
|  | (0.010) | (0.771) | (0.119) | (2.713) |
| F | 4124.76 |  |  |  |
| KPLM |  | 4295.87*** | 3055.99*** | 4275.66*** |
| Controls | Y | Y | Y | Y |
| City fixed effect | Y | Y | Y | Y |
| Industry fixed effect | Y | Y | Y | Y |
| Year fixed effect | Y | Y | Y | Y |
| R2 | 0.139 | 0.356 | 0.026 | 0.262 |
| N | 49531 | 49531 | 49531 | 49531 |
| Panel D: IV estimates of unrelated diversification agglomeration on factor misallocation | | | | |
|  | First stage |  | Second stage |  |
|  | *Rde* | *Lmi* | *Emi* | *Cmi* |
| *Unr* | -0.552*** | 0.935*** | 0.901*** | 0.973*** |
|  | (0.029) | (0.272) | (0.099) | (0.214) |
| F | 357.72 |  |  |  |
| KPLM |  | 190.33*** | 134.81*** | 135.43*** |
| Controls | Y | Y | Y | Y |
| City fixed effect | Y | Y | Y | Y |
| Industry fixed effect | Y | Y | Y | Y |
| Year fixed effect | Y | Y | Y | Y |
| R2 | 0.122 | 0.060 | 0.043 | 0.202 |
| N | 49531 | 49531 | 49531 | 49531 |

Table T5. Results of alternative measures for core explanatory variables

| Panel A: The impacts of specialization agglomeration on factor misallocation | | | | | | | |
| --- | --- | --- | --- | --- | --- | --- | --- |
|  | gross industrial output value | | |  | industrial sales output | | |
|  | *Lmi* | *Emi* | *Cmi* |  | *Lmi* | *Emi* | *Cmi* |
| *Spe* | -0.424* | -0.151*** | -0.348*** |  | -0.410* | -0.151*** | -0.280** |
|  | (0.235) | (0.011) | (0.124) |  | (0.224) | (0.011) | (0.134) |
| Controls | Y | Y | Y |  | Y | Y | Y |
| City fixed effect | Y | Y | Y |  | Y | Y | Y |
| Industry fixed effect | Y | Y | Y |  | Y | Y | Y |
| Year fixed effect | Y | Y | Y |  | Y | Y | Y |
| R2 | 0.048 | 0.344 | 0.020 |  | 0.048 | 0.344 | 0.026 |
| N | 49531 | 49531 | 49531 |  | 49531 | 49531 | 49531 |
| Panel B: The impacts of diversification agglomeration on factor misallocation | | | | | | | |
|  | gross industrial output value | | |  | industrial sales output | | |
|  | *Lmi* | *Emi* | *Cmi* |  | *Lmi* | *Emi* | *Cmi* |
| *Div* | -0.118 | -0.483*** | -0.274 |  | -0.305 | -0.491* | -0.549 |
|  | (0.159) | (0.147) | (0.624) |  | (3.792) | (0.272) | (0.645) |
| Controls | Y | Y | Y |  | Y | Y | Y |
| City fixed effect | Y | Y | Y |  | Y | Y | Y |
| Industry fixed effect | Y | Y | Y |  | Y | Y | Y |
| Year fixed effect | Y | Y | Y |  | Y | Y | Y |
| R2 | 0.026 | 0.031 | 0.019 |  | 0.267 | 0.079 | 0.919 |
| N | 49531 | 49531 | 49531 |  | 49531 | 49531 | 49531 |
| Panel C: The impacts of related diversification agglomeration on factor misallocation | | | | | | | |
|  | gross industrial output value | | |  | industrial sales output | | |
|  | *Lmi* | *Emi* | *Cmi* |  | *Lmi* | *Emi* | *Cmi* |
| *Rel* | -0.393 | -0.975* | -0.257 |  | -0.391 | -1.025* | -0.269 |
|  | (0.365) | (0.578) | (0.234) |  | (0.730) | (0.556) | (0.279) |
| Controls | Y | Y | Y |  | Y | Y | Y |
| City fixed effect | Y | Y | Y |  | Y | Y | Y |
| Industry fixed effect | Y | Y | Y |  | Y | Y | Y |
| Year fixed effect | Y | Y | Y |  | Y | Y | Y |
| R2 | 0.451 | 0.054 | 0.157 |  | 0.457 | 0.037 | 0.145 |
| N | 49531 | 49531 | 49531 |  | 49531 | 49531 | 49531 |
| Panel D: The impacts of unrelated diversification agglomeration on factor misallocation | | | | | | | |
|  | gross industrial output value | | |  | industrial sales output | | |
|  | *Lmi* | *Emi* | *Cmi* |  | *Lmi* | *Emi* | *Cmi* |
| *Unr* | 0.527* | 0.596** | 0.503* |  | 0.502* | 0.604** | 0.492* |
|  | (0.311) | (0.278) | (0.293) |  | (0.269) | (0.270) | (0.291) |
| Controls | Y | Y | Y |  | Y | Y | Y |
| City fixed effect | Y | Y | Y |  | Y | Y | Y |
| Industry fixed effect | Y | Y | Y |  | Y | Y | Y |
| Year fixed effect | Y | Y | Y |  | Y | Y | Y |
| R2 | 0.038 | 0.056 | 0.918 |  | 0.021 | 0.049 | 0.164 |
| N | 49531 | 49531 | 49531 |  | 49531 | 49531 | 49531 |

Table T6. IV estimate results

|  | *Cqi* | |  | *Cqi* | |  | *Cqi* | |
| --- | --- | --- | --- | --- | --- | --- | --- | --- |
|  | First stage | Second stage |  | First stage | Second stage |  | First stage | Second stage |
| IV | 0.011*** |  |  | 0.012*** |  |  | 0.011*** |  |
|  | (0.002) |  |  | (0.001) |  |  | (0.001) |  |
| *Lmi* |  | -0.007* |  |  |  |  |  |  |
|  |  | (0.004) |  |  |  |  |  |  |
| *Emi* |  |  |  |  | -0.167* |  |  |  |
|  |  |  |  |  | (0.086) |  |  |  |
| *Cmi* |  |  |  |  |  |  |  | -0.021* |
|  |  |  |  |  |  |  |  | (0.012) |
| R2 | 0.025 | 0.080 |  | 0.018 | 0.157 |  | 0.042 | 0.114 |
| F | 19.48 |  |  | 254.74 |  |  | 266.87 |  |
| KPLM |  | 14.54*** |  |  | 12.63*** |  |  | 17.31*** |
| Controls | Y | Y |  | Y | Y |  | Y | Y |
| City fixed effect | Y | Y |  | Y | Y |  | Y | Y |
| Industry fixed effect | Y | Y |  | Y | Y |  | Y | Y |
| Year fixed effect | Y | Y |  | Y | Y |  | Y | Y |
| N | 49531 | 49531 |  | 49531 | 49531 |  | 49531 | 49531 |

Table T7. Robustness check for alternative measures

|  | *Cqi* | |  | *Cqi* | |  | *Cqi* | |
| --- | --- | --- | --- | --- | --- | --- | --- | --- |
|  | (1) | (2) |  | (3) | (4) |  | (5) | (6) |
| *Lmi_ACF* | -0.011** |  |  |  |  |  |  |  |
|  | (0.005) |  |  |  |  |  |  |  |
| *Lmi_WRDG* |  | -0.014** |  |  |  |  |  |  |
|  |  | (0.006) |  |  |  |  |  |  |
| *Emi_ ACF* |  |  |  | -0.202*** |  |  |  |  |
|  |  |  |  | (0.050) |  |  |  |  |
| *Emi_WRDG* |  |  |  |  | -0.197*** |  |  |  |
|  |  |  |  |  | (0.049) |  |  |  |
| *Cmi_ ACF* |  |  |  |  |  |  | -0.025*** |  |
|  |  |  |  |  |  |  | (0.002) |  |
| *Cmi_WRDG* |  |  |  |  |  |  |  | -0.025*** |
|  |  |  |  |  |  |  |  | (0.004) |
| Controls | Y | Y |  | Y | Y |  | Y | Y |
| City fixed effect | Y | Y |  | Y | Y |  | Y | Y |
| Industry fixed effect | Y | Y |  | Y | Y |  | Y | Y |
| Year fixed effect | Y | Y |  | Y | Y |  | Y | Y |
| R2 | 0.288 | 0.288 |  | 0.289 | 0.289 |  | 0.288 | 0.288 |
| N | 49531 | 49531 |  | 49531 | 49531 |  | 49531 | 49531 |

Table T8. Mechanisms check

|  | *Cqi* | | | |  | *Cqi* | | | |  | *Cqi* | | | |
| --- | --- | --- | --- | --- | --- | --- | --- | --- | --- | --- | --- | --- | --- | --- |
|  | (1) | (2) | (3) | (4) |  | (5) | (6) | (7) | (8) |  | (9) | (10) | (11) | (12) |
| *Spe* | 0.032*** |  |  |  |  | 0.008*** |  |  |  |  | 0.018*** |  |  |  |
|  | (0.001) |  |  |  |  | (0.001) |  |  |  |  | (0.001) |  |  |  |
| *Div* |  | 0.038*** |  |  |  |  | 0.039*** |  |  |  |  | 0.039*** |  |  |
|  |  | (0.012) |  |  |  |  | (0.012) |  |  |  |  | (0.012) |  |  |
| *Rel* |  |  | 0.018* |  |  |  |  | 0.021* |  |  |  |  | 0.020*** |  |
|  |  |  | (0.010) |  |  |  |  | (0.012) |  |  |  |  | (0.008) |  |
| *Unr* |  |  |  | -0.016*** |  |  |  |  | -0.017*** |  |  |  |  | -0.014*** |
|  |  |  |  | (0.001) |  |  |  |  | (0.002) |  |  |  |  | (0.001) |
| *Lmi* | -0.014* | -0.015* | -0.015** | -0.015 |  |  |  |  |  |  |  |  |  |  |
|  | (0.007) | (0.008) | (0.007) | (0.009) |  |  |  |  |  |  |  |  |  |  |
| *Emi* |  |  |  |  |  | -0.211*** | -0.205*** | -0.204*** | -0.205*** |  |  |  |  |  |
|  |  |  |  |  |  | (0.065) | (0.052) | (0.028) | (0.060) |  |  |  |  |  |
| *Cmi* |  |  |  |  |  |  |  |  |  |  | -0.025** | -0.027*** | -0.027*** | -0.027** |
|  |  |  |  |  |  |  |  |  |  |  | (0.011) | (0.006) | (0.007) | (0.013) |
| Controls | Y | Y | Y | Y |  | Y | Y | Y | Y |  | Y | Y | Y | Y |
| City fixed effect | Y | Y | Y | Y |  | Y | Y | Y | Y |  | Y | Y | Y | Y |
| Industry fixed effect | Y | Y | Y | Y |  | Y | Y | Y | Y |  | Y | Y | Y | Y |
| Year fixed effect | Y | Y | Y | Y |  | Y | Y | Y | Y |  | Y | Y | Y | Y |
| R2 | 0.321 | 0.287 | 0.209 | 0.291 |  | 0.562 | 0.289 | 0.208 | 0.292 |  | 0.219 | 0.289 | 0.175 | 0.232 |
| N | 49531 | 49531 | 49531 | 49531 |  | 49531 | 49531 | 49531 | 49531 |  | 49531 | 49531 | 49531 | 49531 |
